# Supplementary material for: NMDA Receptors Regulate Oxidative Damage in Keratinocytes during Complex Regional Pain Syndrome in HaCaT Cells and Male Rats
Source: MDPI journal article supplement (doi:10.3390/antiox13020244), 2024-02-18
Supplement: s1 [file s1]

**Supplementary Table S1. Antibodies used in immunofluorescence.**

| Antibody                       | Function                                                                                                  | Host   | Company     | Catalog number | Dilution |
|--------------------------------|-----------------------------------------------------------------------------------------------------------|--------|-------------|----------------|----------|
| 8-OHG                          | a marker of DNA/RNA damage caused by oxidation                                                            | Mouse  | Abcam       | Ab62623        | 1:200    |
| NLRP3                          | an inflammasome that facilitates the secretion of proinflammatory cytokines                               | Rabbit | Invitrogen  | SC-06-23       | 1:100    |
| Nrf-2                          | a transcription factor that stimulates the transcription of key antioxidant genes                         | Rabbit | Proteintech | 16396-1-AP     | 1:100    |
| iNOS                           | inducible nitric oxide synthase that upregulated by pathological conditions and promote the production of | Rabbit | Proteintech | 18985-1-AP     | 1:100    |
| Cytokeratin 14                 | a marker of keratinocytes                                                                                 | Rabbit | Proteintech | 10143-1-AP     | 1:200    |
| pan-keratin                    | a marker of keratinocytes                                                                                 | Mouse  | Abcam       | ab8068         | 1:50     |
| 488-conjugated Anti-Mouse IgG  | secondary immunofluorescence antibody                                                                     | Goat   | Proteintech | SA00013-1      | 1:500    |
| 594-conjugated Anti-Rabbit IgG | secondary immunofluorescence antibody                                                                     | Goat   | Proteintech | SA00013-4      | 1:500    |

Abbreviations: 8-OHG, 8-hydroxy-2 deoxyguanosine; NLRP3, NOD-like receptor thermal protein domain associated protein 3; Nrf-2, Nuclear factor erythroid 2-related factor 2; iNOS, inducible nitric oxide synthase.

**Supplementary Table S2. List of the primer sequence for RT-qPCR.**

| Target | Species | Function                                                                            | Direction | Primer sequence 5'-3'    | Product length(bp) |
|--------|---------|-------------------------------------------------------------------------------------|-----------|--------------------------|--------------------|
| Nrf2   | Human   | a transcription factor that stimulates the transcription of key antioxidant genes   | Forward   | GTTCCAAGTCCAGAAGCCAAACTG | 143                |
|        |         |                                                                                     | Reverse   | GTGGAGAGGATGCTGCTGAAGG   |                    |
| HO-1   | Human   | hemeoxygenase-1, an antioxidant gene that has a cytoprotective effect               | Forward   | ACTGCGTTCCTGCTCAACATCC   | 76                 |
|        |         |                                                                                     | Reverse   | ACTGCGTTCCTGCTCAACATCC   |                    |
| GSH    | Human   | glutathione, combines with free radicals to exert a powerful antioxidant effect     | Forward   | CGAGAATGTGGCGTCCCTCTG    | 144                |
|        |         |                                                                                     | Reverse   | TCGTTCTTGGCGTTCTCCTGATG  |                    |
| SOD    | Human   | superoxide dismutase, a crucial enzyme with antioxidative properties.               | Forward   | TCGTTCTTGGCGTTCTCCTGATG  | 75                 |
|        |         |                                                                                     | Reverse   | TCGTTCTTGGCGTTCTCCTGATG  |                    |
| GAPDH  | Human   | widely distributed in various tissues and used as a standardized internal reference | Forward   | GCACCGTCAAGGCTGAGAAC     | 138                |
|        |         |                                                                                     | Reverse   | TGGTGAAGACGCCAGTGGA      |                    |

Abbreviations: Nrf2, Nuclear factor erythroid 2-related factor 2; HO-1, Heme Oxygenase-1; GSH, Glutathione; SOD, Superoxide Dismutase; GAPDH, glyceraldehyde-3-phosphate dehydrogenase.

**Supplementary Table S3 The information on total reads and mapping ratio for Sham, CPIP, and CPIP+I in RNA-Seq**

| Sample   | Total raw reads | Total clean reads | Average length | Clean reads Q30 (%) | Clean reads ratio (%) | Mapped ratio (%) |
|----------|-----------------|-------------------|----------------|---------------------|-----------------------|------------------|
| Sham 1   | 54,665,842      | 52,350,888        | 149.2          | 94.9                | 95.8                  | 96.2             |
| Sham 2   | 65,472,702      | 63,650,948        | 149.1          | 94.0                | 97.2                  | 95.7             |
| Sham 3   | 68,785,886      | 67,076,022        | 149.1          | 94.2                | 97.5                  | 95.5             |
| CPiP 1   | 75,242,610      | 70,530,908        | 149.0          | 94.9                | 93.7                  | 96.9             |
| CPiP 2   | 81,256,734      | 78,292,910        | 149.2          | 94.8                | 96.4                  | 97.2             |
| CPiP 3   | 75,964,080      | 73,824,004        | 149.2          | 94.3                | 97.2                  | 95.7             |
| CPiP+I 1 | 51,505,388      | 50,742,640        | 149.3          | 92.5                | 98.5                  | 95.6             |
| CPiP+I 2 | 59,183,222      | 58,276,128        | 149.5          | 92.9                | 98.5                  | 96.0             |
| CPiP+I 3 | 61,102,598      | 60,151,196        | 149.5          | 92.9                | 98.4                  | 96.1             |

CPiP, Chronic postischemia pain; I, ifenprodil; RNA-Seq, RNA-sequencing.

**Supplementary Table S4. Detailed information about the top 20 upregulated DEGs**

|    | Gene ID            | Gene symbol | Full gene name                                          | Log <sub>2</sub> fold change<br>(CPIP-I/CPIP) | P value   |
|----|--------------------|-------------|---------------------------------------------------------|-----------------------------------------------|-----------|
| 1  | ENSRNOG00000004757 | Tmem158     | transmembrane protein 158                               | 4.57                                          | 2.87E-247 |
| 2  | ENSRNOG00000005158 | Slc24a5     | solute carrier family 24 member 5                       | 4.28                                          | 2.30E-07  |
| 3  | ENSRNOG00000057335 | Clec1b      | C-type lectin domain family 1, member B                 | 4.06                                          | 5.90E-07  |
| 4  | ENSRNOG00000036864 | Actl10      | actin-like 10                                           | 3.94                                          | 1.91E-06  |
| 5  | ENSRNOG00000046449 | Npy         | neuropeptide Y                                          | 3.79                                          | 8.53E-23  |
| 6  | ENSRNOG00000009326 | Smcp        | sperm mitochondria-associated cysteine-rich<br>protein  | 3.68                                          | 8.01E-06  |
| 7  | ENSRNOG00000048651 | Nrtn        | neurturin                                               | 3.50                                          | 1.35E-14  |
| 8  | ENSRNOG00000055936 | Trnp1       | TMF1-regulated nuclear protein 1                        | 3.47                                          | 1.22E-204 |
| 9  | ENSRNOG00000021016 | Ntn5        | netrin 5                                                | 3.45                                          | 1.60E-04  |
| 10 | ENSRNOG00000057315 | Kcnh3       | potassium voltage-gated channel subfamily H<br>member 3 | 3.35                                          | 1.71E-04  |
| 11 | ENSRNOG00000004719 | Pp2d1       | protein phosphatase 2C-like domain containing 1         | 3.25                                          | 1.14E-04  |
| 12 | ENSRNOG00000008849 | Guca2a      | guanylate cyclase activator 2A                          | 3.21                                          | 1.17E-04  |
| 13 | ENSRNOG00000031955 | Calml3      | calmodulin-like 3                                       | 3.11                                          | 1.41E-03  |
| 14 | ENSRNOG00000026387 | Ms4a12      | membrane spanning 4-domains A12                         | 2.96                                          | 5.29E-04  |
| 15 | ENSRNOG00000034236 | C2cd4a      | C2 calcium-dependent domain containing 4A               | 2.95                                          | 5.25E-10  |
| 16 | ENSRNOG00000010972 | Neurog2     | neurogenin 2                                            | 2.90                                          | 6.81E-04  |
| 17 | ENSRNOG00000003109 | Btbd17      | BTB domain containing 17                                | 2.89                                          | 7.58E-05  |
| 18 | ENSRNOG00000048875 | Znrf4       | zinc and ring finger 4                                  | 2.87                                          | 7.83E-04  |
| 19 | ENSRNOG00000008518 | Gsg1        | germ cell associated 1                                  | 2.86                                          | 2.07E-03  |
| 20 | ENSRNOG00000054250 | Fam186b     | family with sequence similarity 186, member B           | 2.78                                          | 2.59E-04  |

**Supplementary Table S5. Detailed information about the top 20 downregulated DEGs**

|    | Gene ID             | Gene symbol  | Full gene name                                                   | Log2 fold change<br>CPIP-I/CPIP | P value  |
|----|---------------------|--------------|------------------------------------------------------------------|---------------------------------|----------|
| 1  | ENSRNOG00000012566  | Kcnv2        | potassium voltage-gated channel modifier<br>subfamily V member 2 | -4.02                           | 2.55E-02 |
| 2  | ENSRNOG00000015972  | Ano5         | anoctamin 5                                                      | -3.54                           | 4.61E-05 |
| 3  | ENSRNOG00000025200  | LOC102553785 | uncharacterized LOC102553785                                     | -3.03                           | 4.11E-04 |
| 4  | ENSRNOG00000032777  | Rpl26-ps1    | ribosomal protein L26, pseudogene 1                              | -2.93                           | 8.36E-04 |
| 5  | ENSRNOG00000003790  | Mael         | maelstrom spermatogenic transposon silencer                      | -2.74                           | 8.47E-03 |
| 6  | ENSRNOG00000042533  | Accs1        | 1-aminocyclopropane-1-carboxylate synthase-like                  | -2.66                           | 8.66E-03 |
| 7  | ENSRNOG00000000897  | Rxfp2        | relaxin/insulin-like family peptide receptor 2                   | -2.65                           | 8.32E-03 |
| 8  | ENSRNOG00000028721  | Otor         | otoraplin                                                        | -2.59                           | 1.22E-02 |
| 9  | ENSRNOG00000021160  | Hormad1      | HORMA domain containing 1                                        | -2.57                           | 1.60E-03 |
| 10 | ENSRNOG00000057989  | Zp2          | zona pellucida glycoprotein 2                                    | -2.57                           | 9.60E-04 |
| 11 | ENSRNOG00000005178  | Cstdc2       | cystatin domain containing 2                                     | -2.49                           | 9.59E-03 |
| 12 | ENSRNOG00000026315  | Taf7l        | TATA-box binding protein associated factor 7-like                | -2.42                           | 1.07E-02 |
| 13 | ENSRNOG00000001942  | Smr3b        | submaxillary gland androgen regulated protein 3B                 | -2.41                           | 2.06E-02 |
| 14 | ENSRNOG000000011823 | Tfap2b       | transcription factor AP-2 beta                                   | -2.39                           | 4.17E-03 |
| 15 | ENSRNOG00000001360  | Stag3        | stromal antigen 3                                                | -2.39                           | 3.88E-03 |
| 16 | ENSRNOG00000029591  | Pkdrej       | polycystin (PKD) family receptor for egg jelly                   | -2.37                           | 6.14E-03 |
| 17 | ENSRNOG00000022937  | Bpifc        | BPI fold containing family C                                     | -2.37                           | 1.10E-02 |
| 18 | ENSRNOG00000030431  | RT1-Db2      | RT1 class II, locus Db2                                          | -2.35                           | 8.34E-03 |
| 19 | ENSRNOG00000002754  | Areg         | amphiregulin                                                     | -2.34                           | 1.24E-02 |
| 20 | ENSRNOG00000059551  | LOC103689976 | sperm motility kinase 3-like                                     | -2.32                           | 1.46E-02 |

**Supplementary Table S6. The detailed information of reversed encoding genes in the CPIP+I group.**

| Gene_ID             | Gene symbol | Full gene name                                               | Log2 fold change (CP/IP/Sham) | Log2 fold change (CP/IP-I/CP/IP) | Reverse rate |
|---------------------|-------------|--------------------------------------------------------------|-------------------------------|----------------------------------|--------------|
| ENSRNOG000000011823 | Tfap2b      | transcription factor AP-2 beta                               | 1.16                          | -2.39                            | 2.06         |
| ENSRNOG000000017248 | Prkag3      | protein kinase AMP-activated non-catalytic subunit gamma 3   | 1.31                          | -1.99                            | 1.52         |
| ENSRNOG000000008849 | Guca2a      | guanylate cyclase activator 2A                               | -2.39                         | 3.21                             | 1.35         |
| ENSRNOG000000038047 | Mt1-ps3     | metallothionein 1, pseudogene 3                              | -1.32                         | 1.75                             | 1.33         |
| ENSRNOG000000059870 | Hoxa11      | homeobox A11                                                 | 1.50                          | -1.92                            | 1.28         |
| ENSRNOG000000021332 | Olr86       | olfactory receptor 86                                        | -1.59                         | 1.85                             | 1.16         |
| ENSRNOG000000002525 | Ptgs2       | prostaglandin-endoperoxide synthase 2                        | 1.10                          | -1.25                            | 1.14         |
| ENSRNOG000000005178 | Cstdc2      | cystatin domain containing 2                                 | 2.28                          | -2.39                            | 1.05         |
| ENSRNOG000000030187 | Mmp12       | matrix metalloproteinase 12                                  | 2.05                          | -2.02                            | 0.99         |
| ENSRNOG000000047673 | Crybb3      | crystallin, beta B3                                          | 1.81                          | -1.79                            | 0.98         |
| ENSRNOG000000029945 | Cuzd1       | CUB and zona pellucida-like domains 1                        | 2.25                          | -2.22                            | 0.98         |
| ENSRNOG000000062245 | Ndufa10l1   | NADH dehydrogenase (ubiquinone) 1 alpha subcomplex 10-like 1 | 1.47                          | -1.41                            | 0.96         |
| ENSRNOG000000042533 | Accs1       | 1-aminocyclopropane-1-carboxylate synthase-like              | 2.84                          | -2.66                            | 0.94         |
| ENSRNOG000000002723 | Sele        | selectin E                                                   | 1.14                          | -1.02                            | 0.90         |
| ENSRNOG000000030478 | mt-Rnr1     | s-rRNA                                                       | -1.28                         | 1.08                             | 0.84         |
| ENSRNOG000000010261 | Rnase10     | ribonuclease A family member 10                              | -2.69                         | 2.23                             | 0.83         |
| ENSRNOG000000043093 | Ap1m2       | adaptor-related protein complex 1, mu 2 subunit              | -2.04                         | 1.67                             | 0.82         |
| ENSRNOG000000015082 | Nlrp10      | NLR family, pyrin domain containing 10                       | 2.42                          | -1.86                            | 0.77         |
